# Supplementary material for: Facet-dependent nonenzymatic glucose sensing properties of Cu2O cubes and octahedra
Source: Royal Society of Chemistry journal article supplement (doi:10.1039/c6nj00450d), 2016-01-01
Supplement: c6nj00450d1.pdf [file c6nj00450d1.pdf]

*Electronic supplementary information*

## **Facet-dependent nonenzymatic glucose sensor properties of Cu<sub>2</sub>O cubes and octahedra**

**Linli Tang<sup>a</sup>, Jian Lv<sup>a</sup>, Chuncai Kong<sup>\*ab</sup>, Zhimao Yang<sup>ab</sup>, and Jianhui Li<sup>\*c</sup>**

a.School of Science, MOE Key Laboratory for Non-Equilibrium Synthesis and Modulation of Condensed Matter, State Key Laboratory for Mechanical Behavior of Materials, Xi'an Jiaotong University, Xi'an 710049, ShaanXi, People's Republic of China. E-mail: kongchc@gmail.com.

b.Collaborative Innovation Center of Suzhou Nano Science and Technology, Xi'an Jiaotong University Suzhou Academy. Suzhou 21500, People's Republic of China

c.Department of Surgical Oncology, Shaanxi Provincial People's Hospital, Third Affiliated Hospital of Medical College of Xi'an Jiaotong University, Xi'an 710049, Shaanxi, People's Republic of China. E-mail: [lijhmd@163.com](mailto:lijhmd@163.com)

### **Experimental sections**

#### **Materials**

Cupric sulfate (CuSO<sub>4</sub>·5H<sub>2</sub>O), Ethylene Diamine Tetraacetic Acid (EDTA), sodium hydroxide (NaOH) and glucose (C<sub>6</sub>H<sub>12</sub>O<sub>6</sub>) were obtained from Aladdin reagent. All chemicals used in our experiment were of analytical grade and used without further purification. Deionized water (18.25 MΩ·cm) from a MilliQ Academic water purification system (Millipore Corp.) was used in all preparations.

#### **Preparation of the Cu<sub>2</sub>O cubes and octahedra**

A typical synthesis of Cu<sub>2</sub>O cubes structures was as follows: 2 mmol CuSO<sub>4</sub>·5H<sub>2</sub>O and 1 mmol EDTA were dissolved in 40 mL deionized water using a breaker, and after 30 min, heated to 55°C, then 5 mL of 3 M NaOH solution was added into the above solution, after being stirred for 5 min. 10 mL of 0.11 M C<sub>6</sub>H<sub>12</sub>O<sub>6</sub> solution was added into the solution under a constant stirring at 55°C for 1.0 h to obtain the desired products,

and then the samples were centrifuged at 12000 rpm for 1 min (XIANYI TG16-WS centrifuged). The precipitates were collected and washed with deionized water and anhydrous ethanol many times, respectively. Finally they were dried at 60°C for 6 h in a vacuum oven. The Cu<sub>2</sub>O octahedra were synthesized according to our previous works.<sup>1</sup>

1. L. Tang, J. Lv, S. Sun, X. Zhang, C. Kong, X. Song and Z. Yang, *New J. Chem.*, 2014, **38**, 4656-4660.

### **Characterization**

The crystalline phase of the samples was characterized by the X-ray diffractometer (Bruker-AXS D8 ADVANCE) with Cu-K $\alpha$  ( $\lambda = 1.54060 \text{ \AA}$ ) in the range of 20~80°. The morphology of the samples was investigated by field-emission scanning electron microscopy (FESEM) using a JEOL (JSM-7000F) at an accelerating voltage of 20 KV.

### **Electrochemical measurements**

A nonenzyme amperometric electrochemical sensor was prepared by casting Nafion-impregnated Cu<sub>2</sub>O powders onto a glassy carbon electrode (GCE) at room temperature. Before modification, the bare GCE with a diameter of 5.0 mm was polished to a mirror-like surface with 0.5  $\mu\text{m}$  and 50 nm alumina slurry, respectively, and then washed ultrasonically in deionized water and ethanol for a few minutes, followed drying at room temperature. The modified electrode was prepared as follows: 5 mg of the as-prepared Cu<sub>2</sub>O powders were respectively dispersed in 5 mL of Nafion solution (0.05%, Sigma-Aldrich), and then sonicated for 20 min to obtain homogeneous dispersed solution. 20  $\mu\text{L}$  of the above suspension was dropped onto the pretreated GCE (denoted as Cu<sub>2</sub>O/Nafion/GCE), and dried at room temperature, respectively. Electrochemical measurements were carried out on a CHI 660E electrochemical workstation (Shanghai Chenhua Co. Ltd., China). The as-prepared Cu<sub>2</sub>O/Nafion/GCE was used as the working electrode with a Pt foil as the counter electrode and Hg/HgO as the reference electrode. C-V and CA were performed in 100 mL of 0.1 M NaOH aqueous solution.

Further, CA was operated by successively injecting different concentration of glucose into 100 mL of 0.1 M NaOH aqueous solution under the potential of +0.65 V. EIS was performed on a VersaSTAT MC workstation, the impedance  $Z$  was expressed in terms of a real ( $Z'$ ) and an imaginary ( $Z''$ ) component. All the measurements were carried out at room temperature.

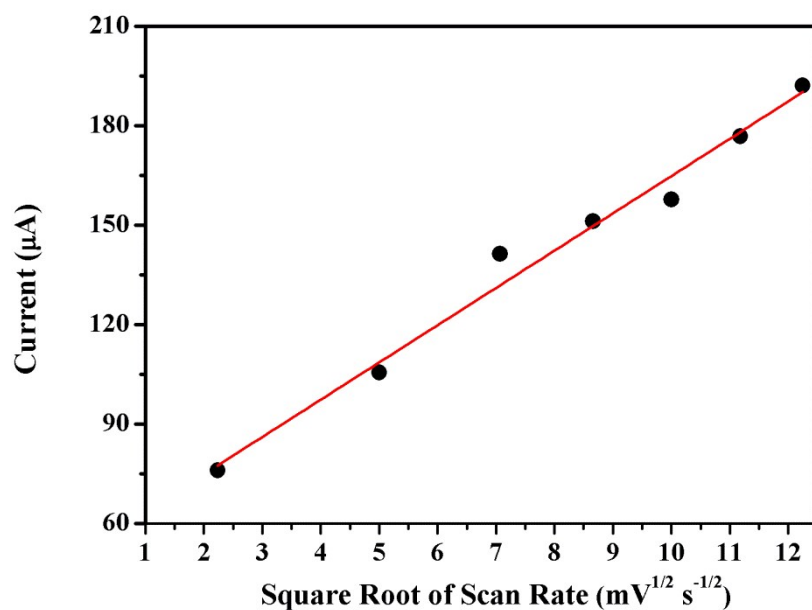

Fig. S1 The relations between peak currents and the square root of scan rate.

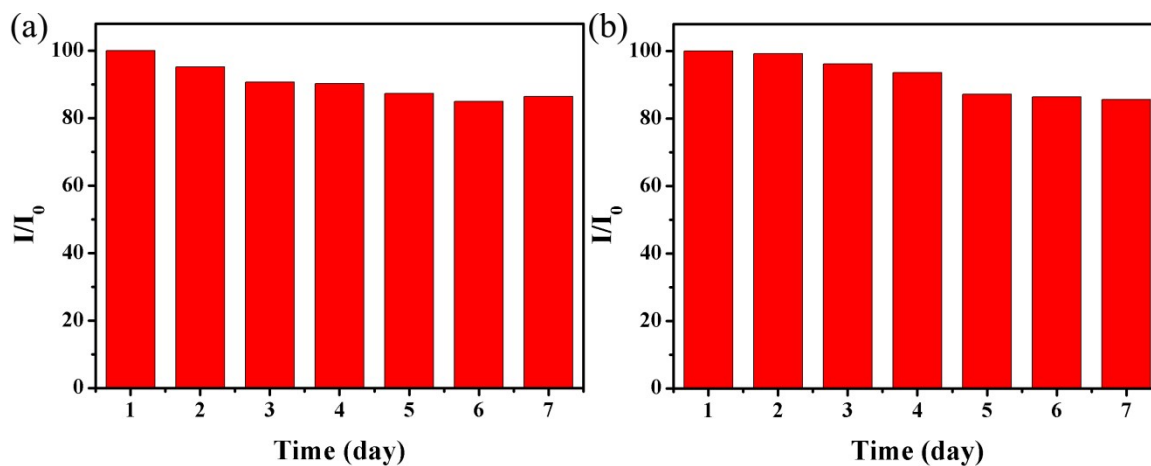

Fig. S2 Long-term stability of the (a) cubic and (b) octahedral  $\text{Cu}_2\text{O}$ -Nafion-GCE electrodes.

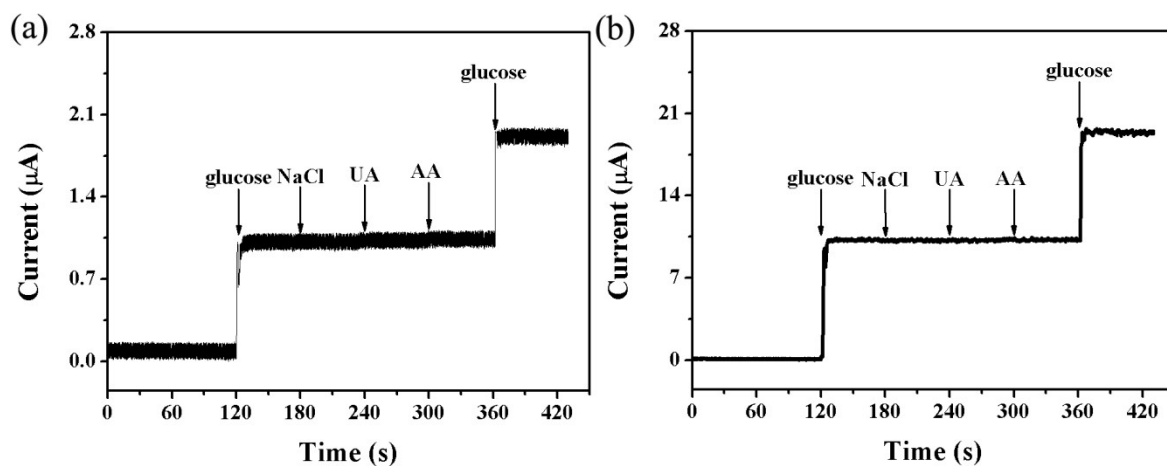

**Fig. S3** Anti-interference test of the (a) cubic and (b) octahedral  $\text{Cu}_2\text{O}$ -Nafion-GCE electrodes in 0.1 M

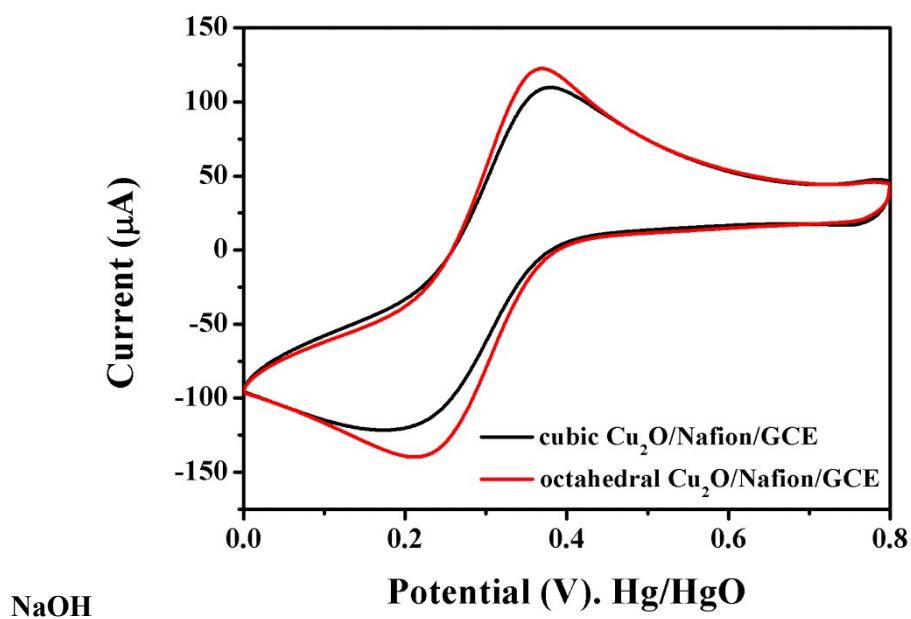

**Fig. S4** The C-V curves of the (a) cubic and (b) octahedral  $\text{Cu}_2\text{O}$ -Nafion-GCE electrodes in 5 mM  $\text{K}_3[\text{Fe}(\text{CN})_6]$  with 0.1 M KCl solution at the scan rate of 100 mV/s.

**Table S1** Determination of glucose concentration in the blood serum samples by the electrodes based on the

Cu<sub>2</sub>O crystals (n = 3).

| Samples        | Hospital (mM) | Our sensors (mM) | R.S.D (%) |
|----------------|---------------|------------------|-----------|
| 1 <sup>a</sup> | 4.63          | 4.83             | 6.70      |
| 2 <sup>a</sup> | 4.03          | 4.01             | 5.49      |
| 3 <sup>b</sup> | 5.54          | 5.36             | 4.37      |
| 4 <sup>b</sup> | 5.34          | 5.19             | 4.20      |

<sup>a</sup> octahedral Cu<sub>2</sub>O-Nafion-GCE electrode.

<sup>b</sup> cubic Cu<sub>2</sub>O-Nafion-GCE electrode.
